# Supplementary material for: Pathological Signatures of White Matter Lesions in Multiple Sclerosis versus Stroke: A Synthetic MRI Study
Source: Research Square preprint supplement (doi:10.21203/rs.3.rs-8338798/v1), 2025-12-30
Supplement: Supplementary file 1 [file cd2b74b873e0304dafa1a84b.docx]

**Supplementary tables**

# **Online Resource.** **Supplementary table 1.** Number of lesions per patient

Distribution of typical MS lesions (MSL), non-specific lesions in MS patients (nsWML-MS), and non-specific lesions in stroke patients (nsWML-S).

|  | Number of patients | | |
| --- | --- | --- | --- |
| Number of Lesions | MSL (n) | nsWML-MS (n) | nsWML-S (n) |
| 1 | 3 | 14 | 5 |
| 2 | 11 | 14 | 9 |
| 3 | 5 | 2 | 2 |
| 4 | 4 | - | 1 |
| 5 | 1 | - | - |
| 7 | - | - | 1 |
| 8 | - | - | 1 |
| Total Patients | 24 | 30 | 19 |

**Online Resource.** **Supplementary Table 2**. Descriptive statistics and Wilcoxon signed-rank test results for non-specific white matter lesions in MS patients (nsWML-MS) and typical MS lesions (MSL) in MS patients (n = 24).

| SyMRI  Parameters | nsWML-MS  Median (IQR) | MSL  Median (IQR) | Mean ± SD (nsWML-MS) | Mean ± SD (MSL) | p-value |
| --- | --- | --- | --- | --- | --- |
| Myelin conten (MyC) | 10.63 (3.96–15.68) | 1.98 (0.79–3.00) | 11.10 ± 7.73 | 2.47 ± 2.32 | <0.0001 |
| Proton  density (PD) | 80.63 (74.55–85.40) | 89.93 (87.18–91.73) | 79.94 ± 6.39 | 89.30 ± 4.88 | <0.0001 |
| R1 | 0.92 (0.82–0.99) | 0.74 (0.71–0.77) | 0.92 ± 0.11 | 0.75 ± 0.08 | <0.0001 |
| R2 | 10.37 (9.91–11.02) | 9.20 (8.30–9.42) | 10.46 ± 1.11 | 8.96 ± 0.83 | <0.0001 |

**Online Resource.** **Supplementary table 3**. Logistic regression models predicting MS status based on mean values of non-specific white matter lesions in MS (nsWML-MS) and stroke (nsWML-S).

| SyMRI  parameters | Unadjusted  OR (95% CI), p | Age-adjusted  OR (95% CI), p | AUC  (95% CI) | AUC/ Age  (95% CI) |
| --- | --- | --- | --- | --- |
| MyC | 0.91 (0.83–1.00), p=0.038 | 0.96 (0.87–1.06), p=0.452 | 0.67 (0.52–0.83) | 0.84 (0.73–0.96) |
| PD | 1.13 (1.02–1.28), p=0.020 | 1.06 (0.93–1.21), p=0.371 | 0.68 (0.53–0.84) | 0.85 (0.73–0.97) |
| R1 | 0.64 (0.33–1.14), p=0.131 | 0.82 (0.40–1.67), p=0.578 | 0.62 (0.46–0.78) | 0.83 (0.71–0.95) |
| R2 | 0.72 (0.40–1.26), p=0.252 | 0.72 (0.36–1.42), p=0.343 | 0.60 (0.43–0.77) | 0.84 (0.73–0.96) |
| Age | 0.85 (0.75–0.93), p<0.001 | - | 0.83 (0.71–0.95) | - |

**Online Resource.** **Supplementary table 4.** Pearson correlations between SyMRI parameters and age in non-specific white matter lesions in MS (nsWML-MS) and stroke (nsWML-S).

| Variable 1 | Variable 2 | r | p-value |
| --- | --- | --- | --- |
| MyC (nsWML-MS) | PD (nsWML-MS) | -0.97 | <0.0001 |
| MyC (nsWML-MS) | R1 (nsWML-MS) | 0.84 | <0.0001 |
| MyC (nsWML-MS) | R2 (nsWML-MS) | 0.69 | <0.0001 |
| PD (nsWML-MS) | R1 (nsWML-MS) | -0.81 | <0.0001 |
| PD (nsWML-MS) | R2 (nsWML-MS) | -0.64 | <0.0001 |
| MyC (nsWML-MS) | Age | 0.47 | 0.008 |
| MyC (nsWML-S) | PD (nsWML-S) | -0.96 | <0.0001 |
| MyC (nsWML-S) | R1 (nsWML-S) | 0.83 | <0.0001 |
| MyC (nsWML-S) | R2 (nsWML-S) | 0.74 | <0.0001 |
| PD (nsWML-S) | R1 (nsWML-S) | -0.81 | <0.0001 |
| PD (nsWML-S) | R2 (nsWML-S) | -0.72 | <0.0001 |
| MyC (nsWML-S) | Age | 0.17 | 0.361 |

**Online Resource.** **Supplementary table 5.** Pearson correlations between SyMRI parameters and age in normal-appearing white matter (NAWM) of MS and stroke patients.

| Variable 1 | Variable 2 | r | p-value |
| --- | --- | --- | --- |
| MyC (MS) | PD (MS) | -0.95 | <0.0001 |
| MyC (MS) | R1 (MS) | 0.88 | <0.0001 |
| MyC (MS) | R2 (MS) | 0.74 | <0.0001 |
| PD (MS) | R1 (MS) | -0.89 | <0.0001 |
| PD (MS) | R2 (MS) | -0.75 | <0.0001 |
| MyC (MS) | Age | 0.33 | 0.120 |
| MyC (Stroke) | PD (Stroke) | -0.94 | <0.0001 |
| MyC (Stroke) | R1 (Stroke) | 0.91 | <0.0001 |
| MyC (Stroke) | R2 (Stroke) | 0.83 | <0.0001 |
| PD (Stroke) | R1 (Stroke) | -0.92 | <0.0001 |
| PD (Stroke) | R2 (Stroke) | -0.84 | <0.0001 |
| MyC (Stroke) | Age | 0.05 | 0.792 |

**Online Resource.** **Supplementary Table 6**. Comparison of normal-appearing white matter (NAWM) between MS and stroke patients.

| SyMRI  Parameters | MS Median (IQR) | MS Min–Max | Stroke Median (IQR) | Stroke  Min–Max | P-value |
| --- | --- | --- | --- | --- | --- |
| MyC | 36.35 (35.60–38.20) | 30.90–44.40 | 38.00 (36.10–40.40) | 31.60–43.20 | 0.0930 |
| PD | 61.85 (60.60–62.30) | 56.50–65.40 | 60.70 (59.20–61.90) | 57.30–64.90 | 0.0968 |
| R1 | 1.42 (1.37–1.46) | 1.29–1.62 | 1.45 (1.41–1.52) | 1.31–1.57 | 0.0680 |
| R2 | 15.61 (14.98–16.13) | 14.13–16.54 | 15.73 (15.22–16.46) | 14.11–17.26 | 0.3053 |

**Online Resource.** **Supplementary Table 7**. Logistic regression models predicting MS status based on normal-appearing white matter (NAWM) parameters.

| Parameter | Unadjusted OR (95% CI), p | Age-adjusted OR (95% CI), p | AUC (95% CI) | AUC incl. Age (95% CI) |
| --- | --- | --- | --- | --- |
| MyC | 0.87 (0.70–1.06), p=0.161 | 0.76 (0.56–0.98), p=0.031 | 0.65 (0.49–0.81) | 0.86 (0.75–0.97) |
| PD | 1.24 (0.92–1.72), p=0.163 | 1.52 (1.04–2.40), p=0.032 | 0.65 (0.48–0.81) | 0.86 (0.75–0.97) |
| R1 | 0.42 (0.16–0.96), p=0.038 | 0.25 (0.06–0.70), p=0.007 | 0.66 (0.50–0.82) | 0.86 (0.75–0.97) |
| R2 | 0.63 (0.27–1.39), p=0.254 | 0.42 (0.14–1.07), p=0.069 | 0.59 (0.42–0.76) | 0.86 (0.75–0.98) |
| Age | 0.85 (0.75–0.93), p<0.001 | - | 0.83 (0.71–0.95) | - |
